# Supplementary material for: Tradict enables accurate prediction of eukaryotic transcriptional states from 100 marker genes
Source: PubMed Central journal article supplement (PMC5424156; doi:10.1038/ncomms15309), 2017-05-05
Supplement: ncomms15309-s1.pdf [file ncomms15309-s1.pdf]

# Supplementary Information

1  
2  
3  
4

## Supplementary Figures

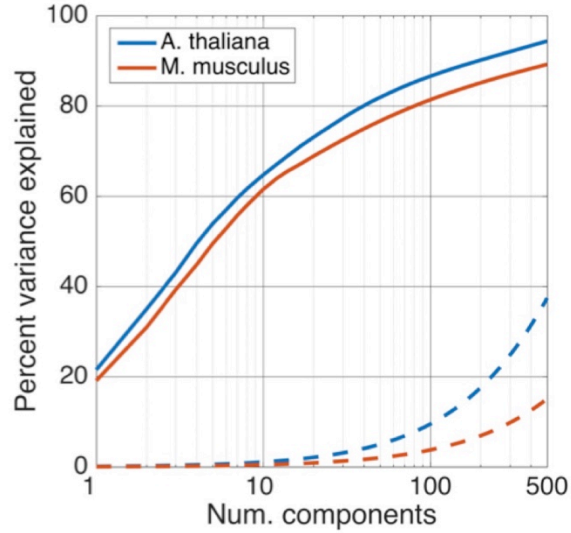

5  
6  
7  
8  
9  
10

**Supplementary Figure 1. The eukaryotic transcriptome is compressible.** The transcriptome is of low dimensionality, with 100 principal components able to explain 80% or more of expression variation. Dotted lines illustrate cumulative expression variation explained on a null model realization, where each gene's expression vector was permuted to break correlative ties to other genes.

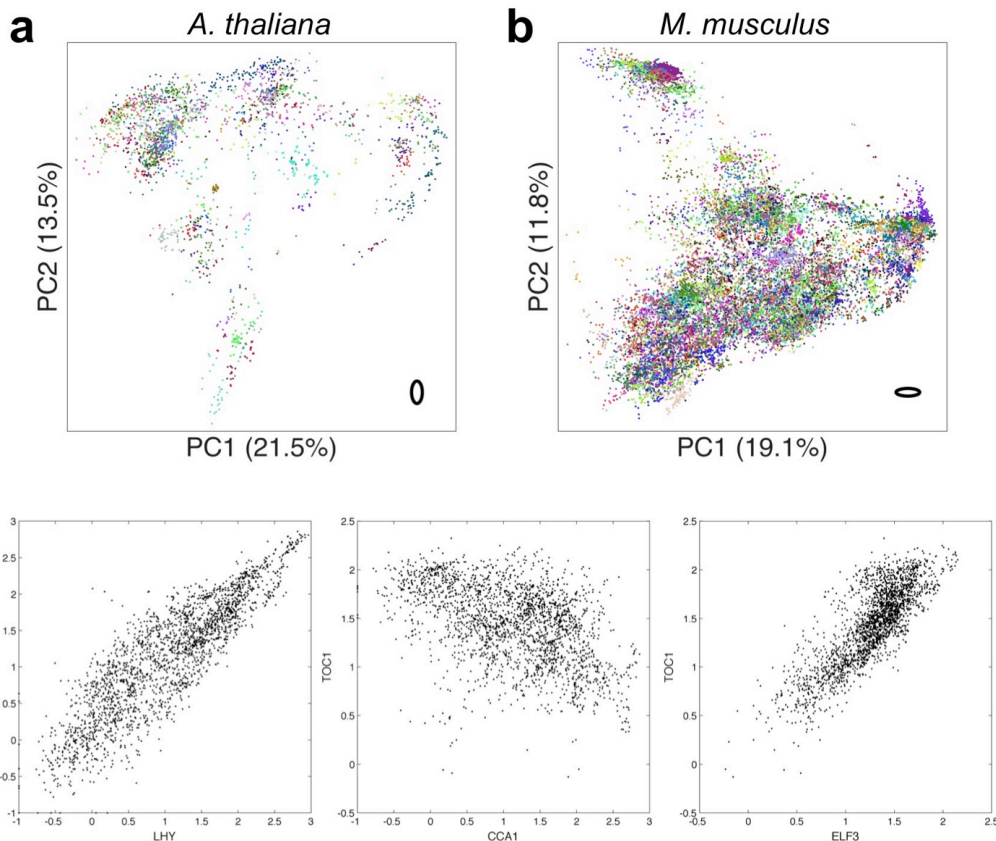

11  
 12 **Supplementary Figure 2. Our training collection is of high technical quality.** Two dimensional principal  
 13 components analysis for a) *A. thaliana* and b) *M. musculus*, where each sample is colored by the submission it  
 14 belongs to. Note that while multiple submissions may have similar colors, each expression cluster contains many  
 15 submissions. Bold, black ovals in the bottom left of each plot illustrate two standard deviation covariances for the  
 16 median variance submission. c) Expression of late and early elements of the *A. thaliana* circadian clock matches  
 17 expectations. Scatter plots of *LHY*, *CCA1*, and *ELF3* expression across all transcriptomes in the training collection.  
 18 *LHY* and *CCA1* expression is activated by *TOC1*. *CCA1* and *LHY* protein inhibits *TOC1* and *ELF3* transcription.  
 19  
 20

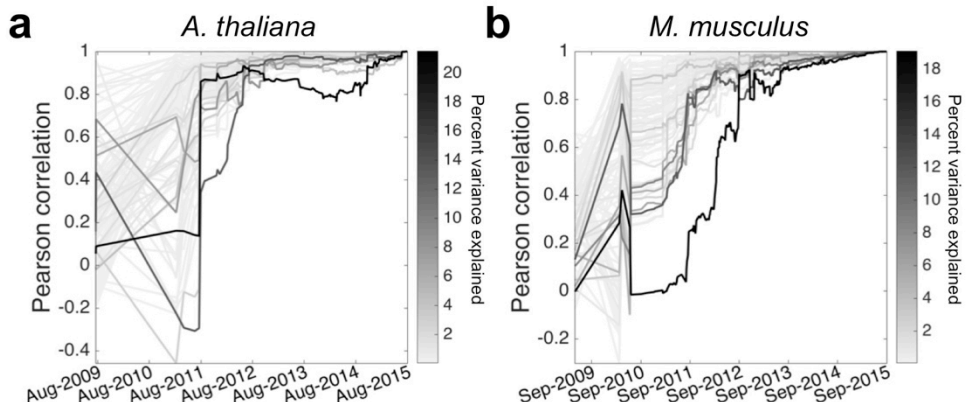

21  
 22 **Supplementary Figure 3. The expression space has stabilized.** For each of the first 100 principal components  
 23 (PCs), depicted is the Pearson correlation between how samples were distributed along the PC at a select point in  
 24 the past and how they are distributed currently. Each line, representing a PC, is shaded by the percent variance  
 25 explained by that PC. a) *A. thaliana*. b) *M. musculus*.

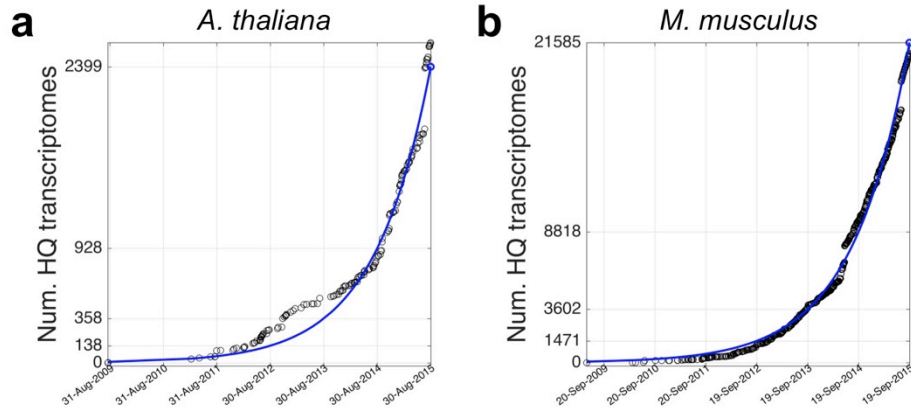

26

27 **Supplementary Figure 4. The number of high quality transcriptomes deposited in the SRA is growing**  
 28 **exponentially. SRA growth for a) *A. thaliana*, and b) *M. musculus*.**

29

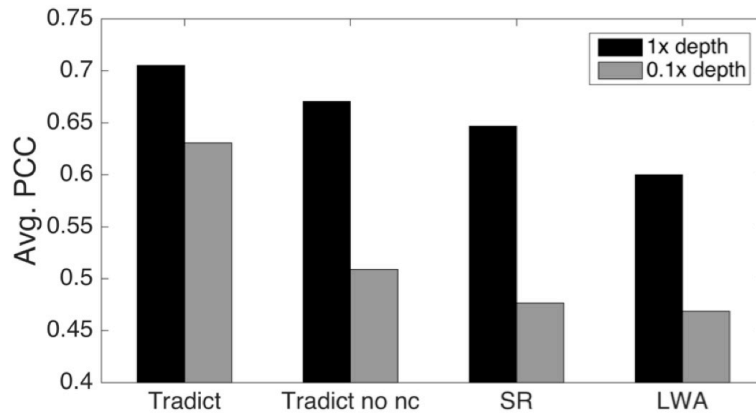

30

31 **Supplementary Figure 5. Tradict outperforms leading methods and is robust to noise.** Tradict was trained on  
 32 the first (historically speaking) 90% of SRA submissions and then tasked with predicting the remaining 10% of “test-  
 33 set” submissions. Shown is the intra-submission prediction accuracy of gene expression on the same test-set  
 34 processed normally or rarefied to 0.1x depth. ‘Tradict no nc’ uses the same algorithm as Tradict, however, a diagonal  
 35 covariance is used over markers, instead of a full one. SR and LWA refer to the structured regression and locally  
 36 weighted averaging baselines (Supplementary Note 2).

37

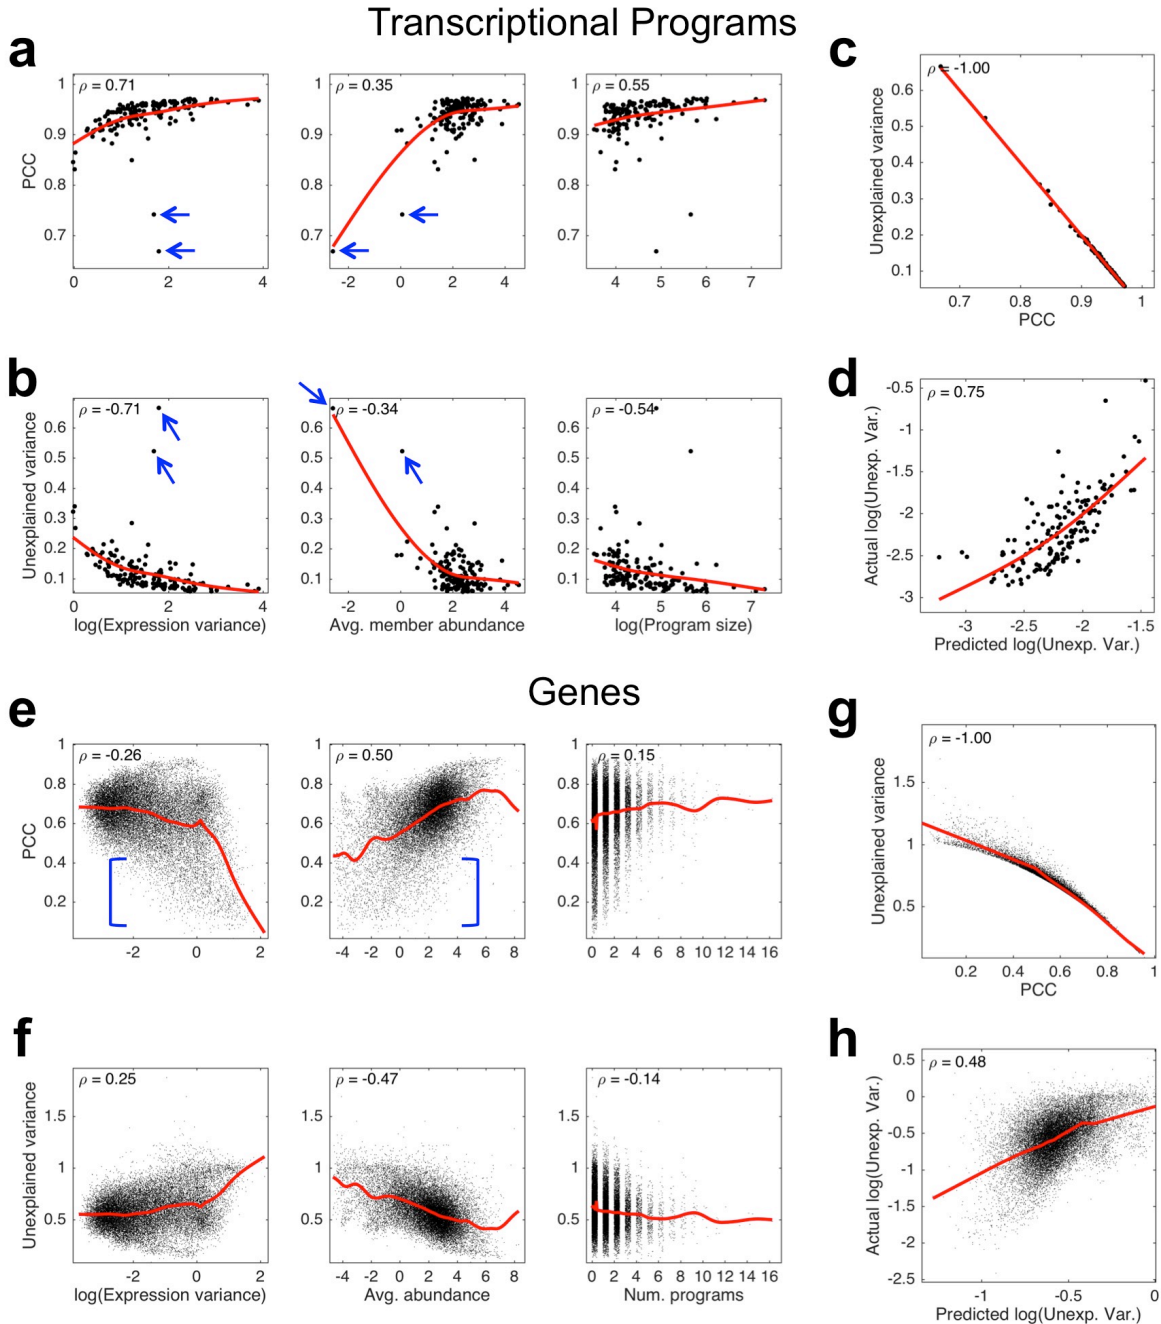

38  
 39 **Supplementary Figure 6. Error analysis reveals likely sources of prediction error.** a) PCC between predicted  
 40 and actual expression of transcriptional programs versus the logarithm of program expression variation (left), average  
 41 abundance of genes within the program (middle), and the logarithm of the number of genes contained within the  
 42 program. b) Same as (a) but with the proportion of unexplained variance as the measure of predictive performance  
 43 instead of PCC. c) Relationship between PCC and unexplained variance. d) Actual log(unexplained variance) vs.  
 44 predicted log(unexplained variance) based on a linear model that uses log(expression variation), average member  
 45 abundance, and log(program size) as predictors of error. e-h) Same as (a-d) but for genes instead of programs. Here  
 46 'avg. abundance' denotes the average abundance of the gene, and 'num. programs' denote the number of programs  
 47 the gene participates in. Spearman correlation coefficient ( $\rho$ ) is noted in each plot. Red lines illustrate a cubic spline  
 48 interpolation.

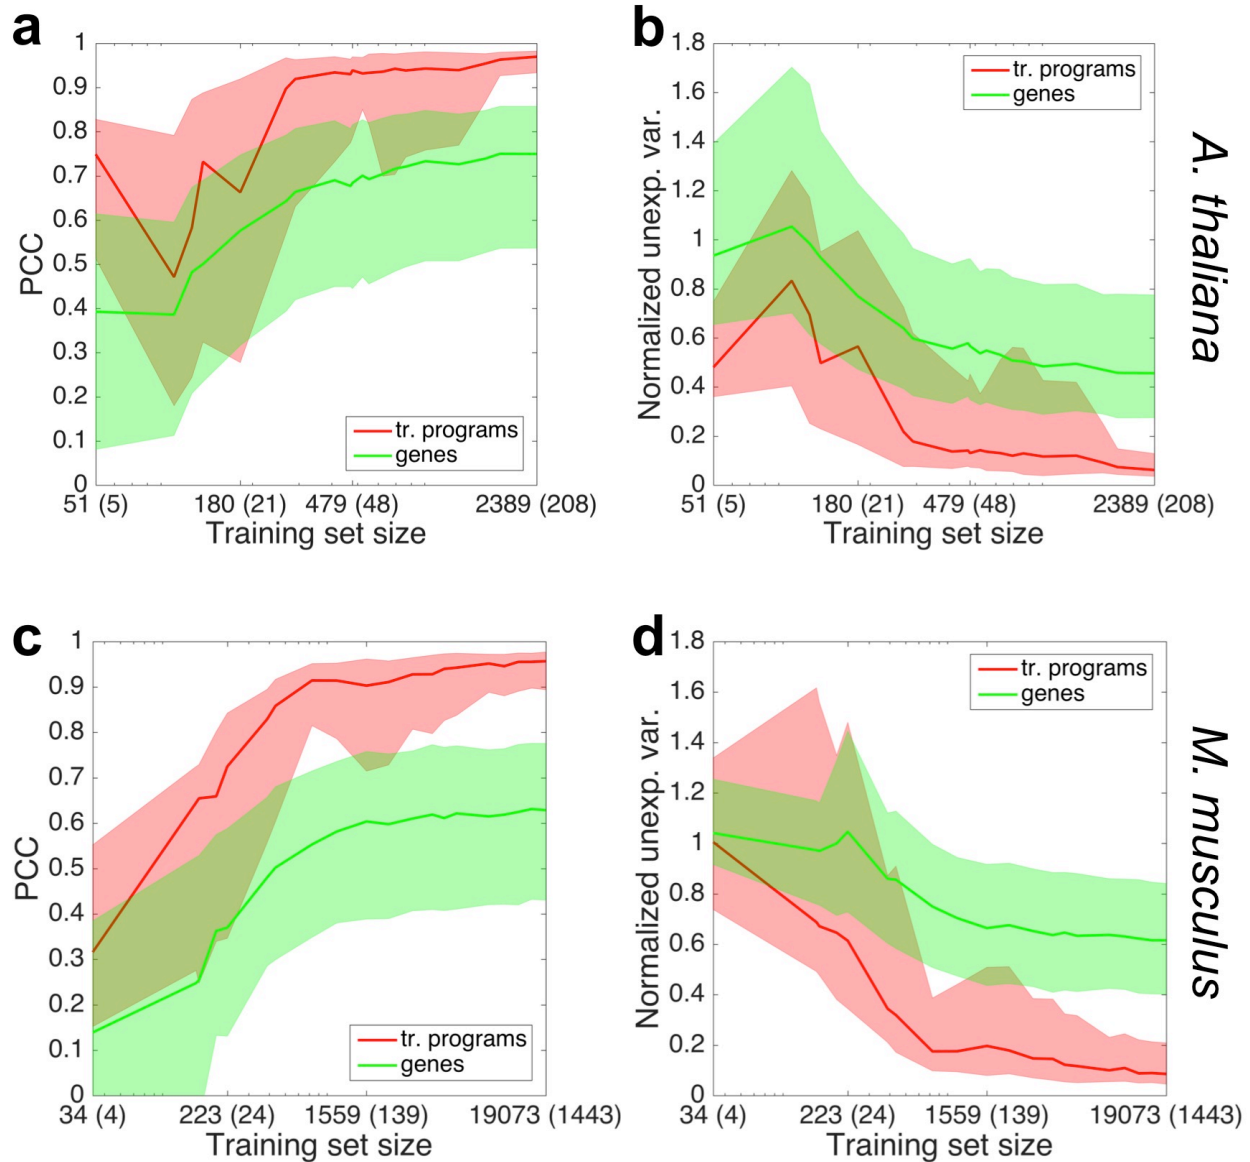

50

51 **Supplementary Figure 7. Power analysis reveals Tradict needs approximately 1000 samples to make accurate**  
 52 **predictions.** Test-set prediction accuracies in the form of a) PCC or b) normalized unexplained variance as a  
 53 function of the size of the *A. thaliana* training set. X-axis tick labels are in the form of “Y (Z)” where Y denotes the  
 54 number of samples in the training set and Z denotes the number of unique submissions to which these training set  
 55 samples belong. The solid line depicts the median program (red) or gene (green) and the shaded error bands denote  
 56 the 20<sup>th</sup> and 80<sup>th</sup> percentile program or gene. c-d) same as (a) and (b) but for *M. musculus*. Plots in (a) and (c) are  
 57 plotted on a base 10 logarithmic scale.

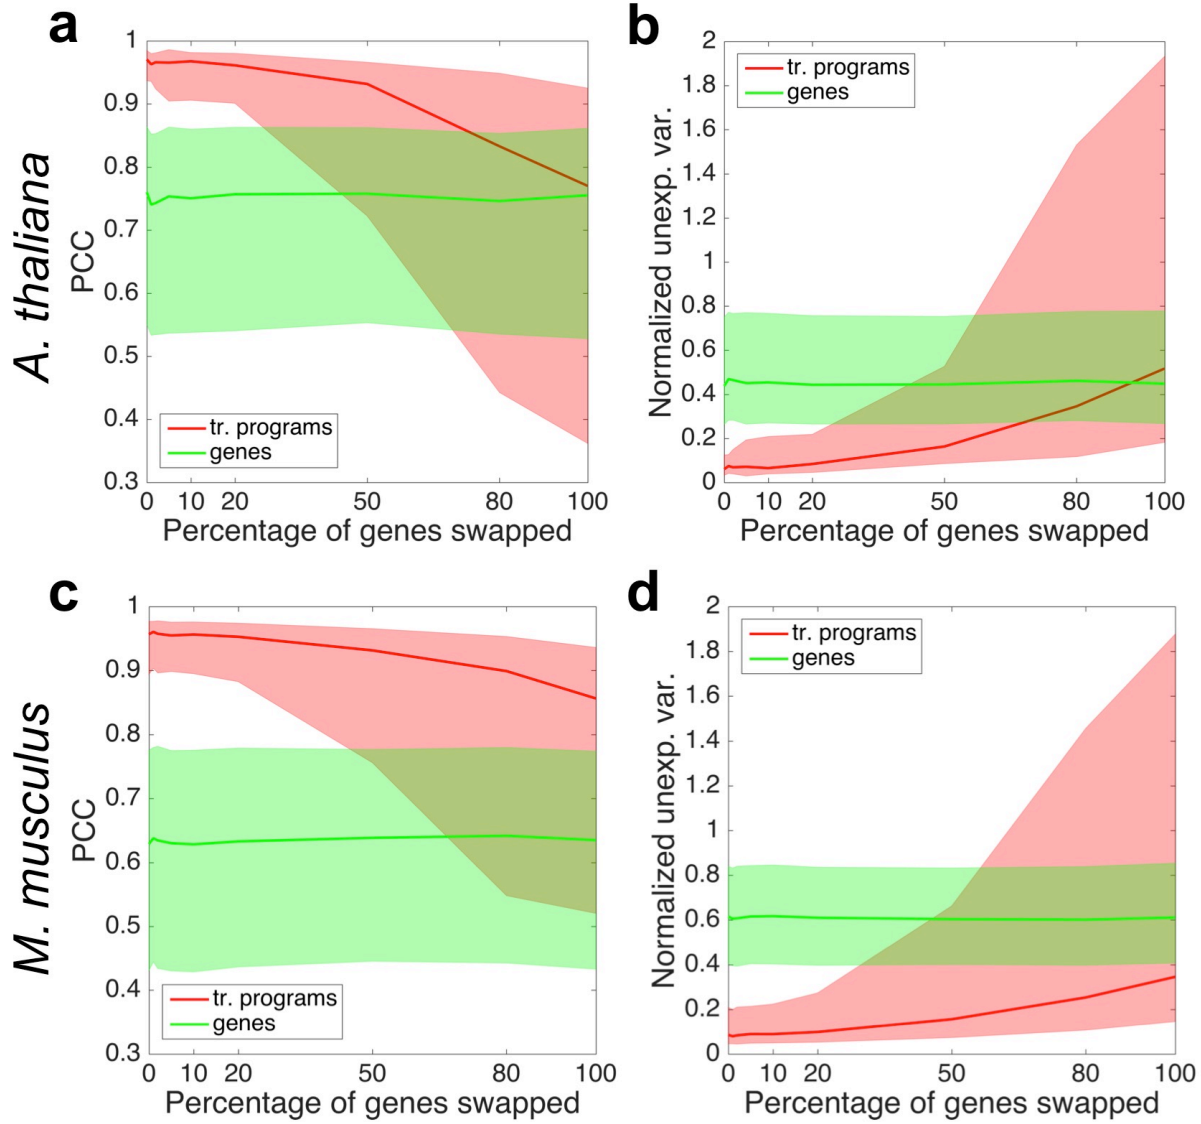

58  
 59 **Supplementary Figure 8. Tradict is robust with respect to the annotations used to define transcriptional**  
 60 **programs.** Test-set prediction accuracies in the form of a) PCC or b) normalized unexplained variance as a function  
 61 of the percentage of genes randomly exchanged for each *A. thaliana* transcriptional program. The solid line depicts  
 62 the median program (red) or gene (green) and the shaded error bands denote the 20<sup>th</sup> and 80<sup>th</sup> percentile program or  
 63 gene. c-d) same as (a) and (b) but for *M. musculus*.



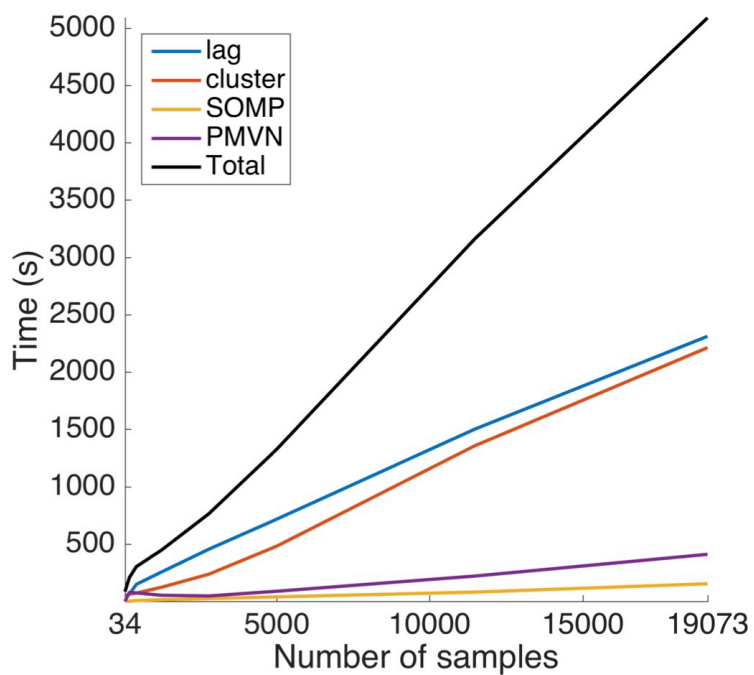

64  
 65 **Supplementary Figure 9. Timing analysis.** Training time vs. training set size in terms of number of samples. Black  
 66 line denotes the total training time and colored lines depict training times for each component of training. 'lag' (blue)  
 67 and 'cluster' (orange) are the times needed to compute the lag transformation of the training set and to define and  
 68 cluster the transcriptional programs, respectively. 'SOMP' (yellow) denotes the time required to perform the  
 69 Simultaneous Orthogonal Matching Pursuit decomposition of the transcriptional programs, and 'PMVN' (purple)  
 70 denotes the time required to learn the parameters of the Continuous-Poisson Multivariate Normal hierarchical model.  
 71

72

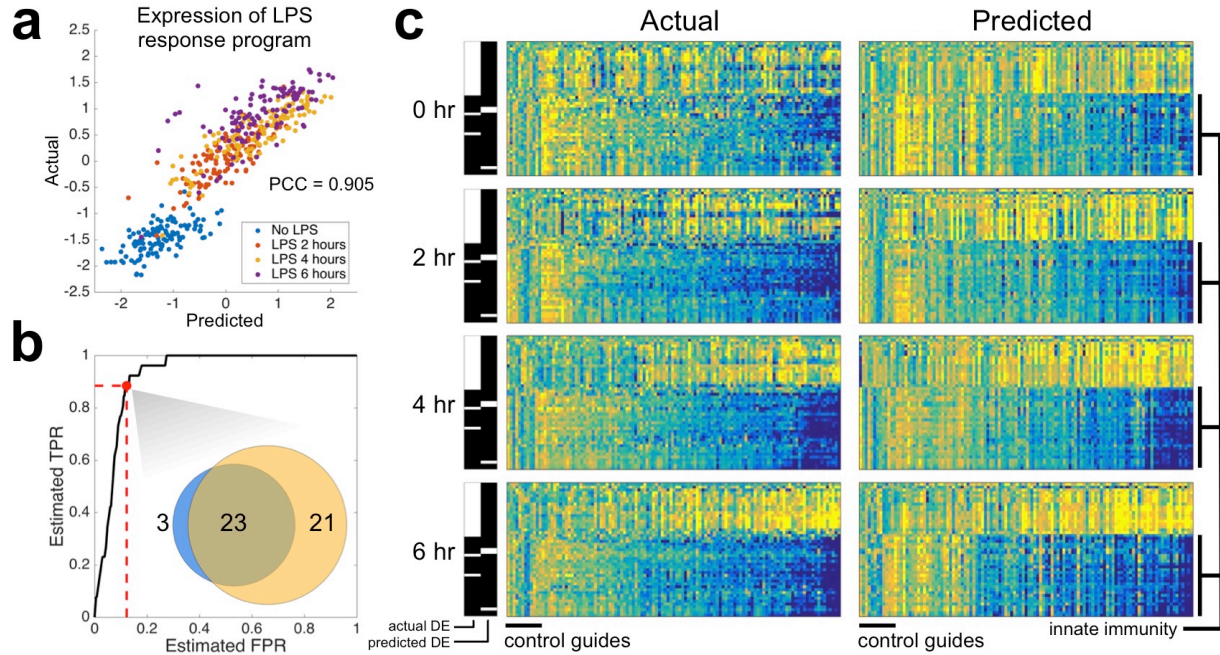

73  
 74 **Supplementary Figure 10. Tradict accurately predicts temporal transcriptional responses to**  
 75 **lipopolysaccharide treatment in a dendritic cell line CRISPR library.** a) Actual vs. predicted z-score standardized  
 76 expression of the “response to lipopolysaccharide” transcriptional program. Samples are colored by time point. b)  
 77 Receiver operator characteristic (ROC) curve illustrating Tradict’s accuracy for identifying differentially expressed  
 78 (DE) transcriptional programs. Here the “truth set” was considered to be all DE programs with FDR < 0.01 based on  
 79 actually measured expression values. The marked point along the ROC curve and the inset Venn diagram depict the  
 80 concordance between the predicted and actual set of DE transcriptional programs when an FDR threshold of 0.01 for  
 81 predicted DE programs was also used. c) Predicted vs actual heatmaps of DE transcriptional programs (rows) across  
 82 time for different CRISPR lines (columns). Here, DE programs included those found either in actuality or by prediction  
 83 and are accordingly marked by the black and white indicator bars on the left of each sub-block. Columns of these  
 84 heat maps represent different profiled lines. The first 12 correspond to negative control guides, whereas the  
 85 remaining columns correspond to positive regulators of Tnf expression. The expression of programs in each sub-  
 86 block is z-score normalized to their expression in the negative control guide lines. The bottom 26 programs are all of  
 87 those directly related to innate immunity among the 368 programs we’ve defined for *M. musculus*. All heatmaps are  
 88 clustered in the same order across time, genotype, and between predicted and actual.  
 89



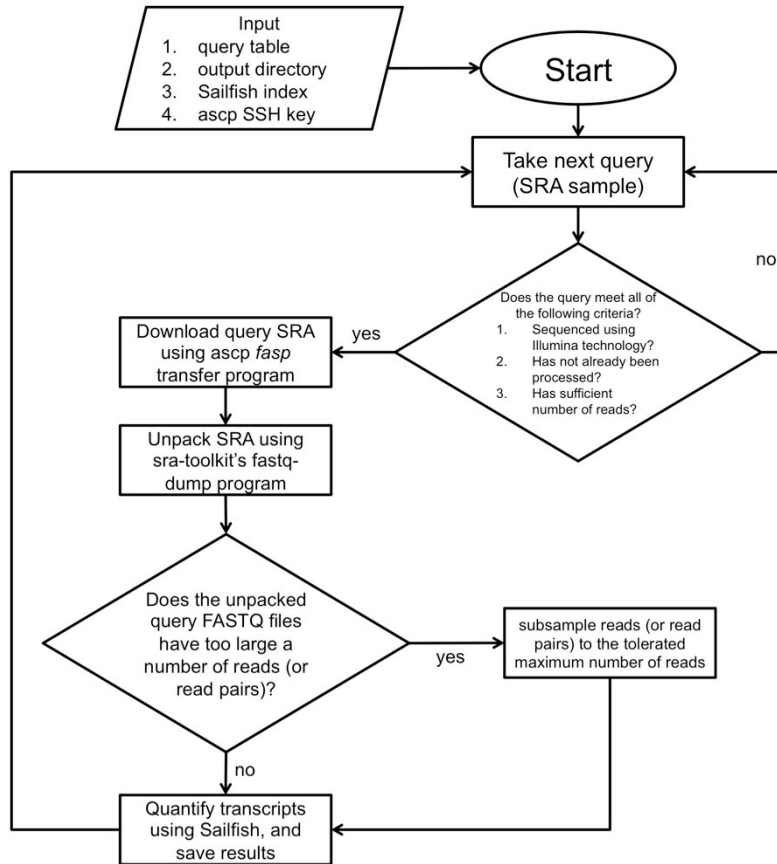

90

91 **Supplementary Figure 11.** Algorithmic workflow of data acquisition and quantification as implemented by  
92 `srafish.pl`.

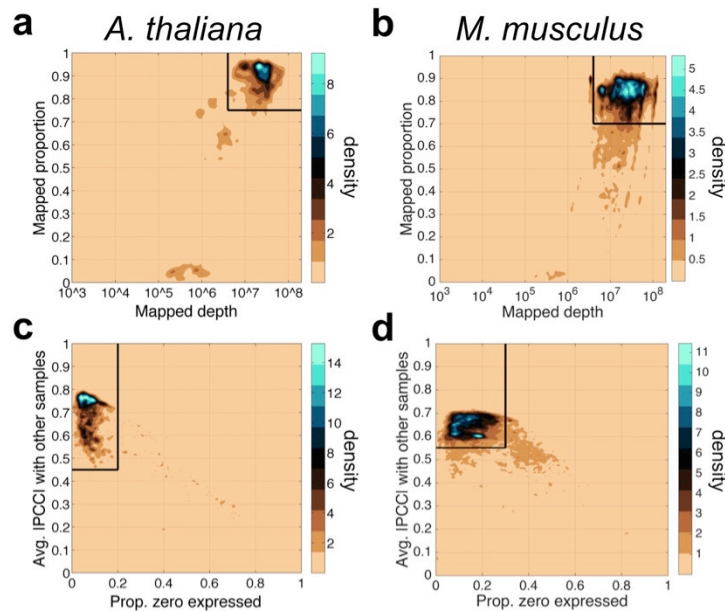

93

94

95

**Supplementary Figure 12.** Quality filtering thresholds for mapping depth and proportion (a,b), and for average correlation to other samples and proportion of zeros (c,d).

96

97 **Supplementary Notes**

98 **Supplementary Note 1 - Our training transcriptomes are reflective of biology and are of**  
99 **high technical quality**

100 We manually annotated metadata for 1,626 (62.6%, *A. thaliana*) and 6,682 (32.1%, *M.*  
101 *musculus*) of the training transcriptomes for both organisms, and found that the major drivers of  
102 variation were tissue and developmental stage (Figure 1a-b, main text). The first three principal  
103 components of our training collection explained a substantial proportion of expression variation  
104 for each organism (43.1% *A. thaliana*, 39.3% *M. musculus*). For *A. thaliana* PC1 was primarily  
105 aligned with the physical axis of the plant, with above ground, photosynthetic tissues having  
106 lower PC1 scores and below ground, root tissues having higher PC1 scores. Interestingly,  
107 samples found intermediate to the major below- and above-ground tissue clusters consisted of  
108 seedlings grown in constant darkness or mutant seedlings (e.g. *det1*, *pif*, *phy*) compromised for  
109 photomorphogenesis. Thus, PC1 can also be considered to align with light perception and  
110 signaling. By contrast, PC2 represented a developmental axis, with more embryonic tissues  
111 (seeds, endosperms) having lower PC2 scores, and more developed tissues having higher PC2  
112 scores (Figure 1a, main text).

113 For *M. musculus*, PC1 described a hematopoietic-nervous system axis. Cardiovascular,  
114 digestive, respiratory, urinary and connective tissues were found intermediate along this axis,  
115 and with the exception of liver tissue, were not differentiable along the first three PCs.  
116 Interestingly, as observed for *A. thaliana*, PC2 represented a developmental axis, with general  
117 “stemness” decreasing with increasing PC2 score. Consistent with this trend, nervous tissue  
118 from embryos and postnatal mice had consistently lower PC2 scores than mature nervous  
119 tissue. We did not find any significant correlation between *Xist* expression and any of the top  
120 twenty PCs, suggesting that sex was not a major driver of global gene expression relative to  
121 tissue and developmental context. This is consistent with findings reported in Crowley *et al.*  
122 (2015)<sup>1</sup>.

123 To understand the compressibility of our training transcriptome collection beyond the first  
124 three PCs, we examined the percent of expression variation explained by subsequent  
125 components. Strikingly, we found the first 100 principal components were sufficient to explain  
126 86.6% and 81.4% of expression variation in the observed transcriptomes for *A. thaliana* and *M.*  
127 *musculus*, respectively. By contrast, the first 100 principal components of a null model  
128 realization, in which the expression vectors for each gene were independently permuted, could  
129 only explain 5-10% of expression variation for both organisms (Supplementary Fig. 1). Given  
130 the phylogenetic distance spanned by *A. thaliana* and *M. musculus*, this transcriptomic  
131 compressibility is likely a shared property of all eukaryotes.

132 To further assess the quality and representativeness of our training collection, we  
133 examined the distribution of SRA submissions across the expression space, compared inter-  
134 submission variability within and between tissues, inspected expression correlations among  
135 genes with well established regulatory relationships, and assessed the evolution of the  
136 expression space across time. Technical variation due to differences in laboratory procedures  
137 across labs is difficult to assess since this requires two different labs to perform the same,  
138 equivalently aimed experiment. Nevertheless, for both organisms, each tissue or development  
139 specific cluster was supported by multiple submissions, and importantly, inter-submission  
140 variability within a tissue or developmental context was significantly smaller than inter-  
141 tissue/developmental stage variability (p-value = 1.23e-16, F-test; Supplementary Fig. 2a-b).  
142 We also compared the expression of *ELF3*, *LHY*, and *TOC1* -- early and late elements of the *A.*  
143 *thaliana* circadian clock -- and found strong correlation in their expression with a direction and  
144 magnitude that fit established expectations (Supplementary Fig. 2c)<sup>2</sup>.

145 We next performed a temporal rarefaction analysis. We compared (measured by  
146 Pearson correlation) how past distributions of samples along each of the first 100 principal

147 components compared to their present distribution. Supplementary Fig. 3 illustrates that the  
148 expression space stabilized in 2013, and that new transcriptome samples that are added to the  
149 SRA tend to fall within already established clusters. We further note that the amount of usable  
150 transcriptomic data deposited on the SRA, and hence the representativeness of our sample, is  
151 increasing exponentially (Supplementary Fig. 4).

## 152 153 **Supplementary Note 2 - Tradict outperforms leading approaches and is robust to noise** 154 **from low sequencing depth and/or corrupted marker measurements**

155  
156 **Baseline descriptions:** As baselines for Tradict, we considered three alternative  
157 approaches. The first two, locally weighted averaging (LWA) and structured regression (SR) are  
158 the two best performing methods used in Donner *et al.* (2012)<sup>3</sup>. LWA, a non-parametric and  
159 non-linear approach, formulates predictions as weighted averages of the entire training set,  
160 where weights are determined by the distance between a query set of marker expressions and  
161 the expression of those markers in a training transcriptome. The exact weighting function is  
162 given by a Gaussian kernel, whose bandwidth we learn through cross-validation. This method is  
163 conceptually similar to nearest-neighbor based imputation methods in that predictions of gene  
164 expression come in the form of weighted averages of neighbor transcriptomes. In Donner *et al.*  
165 (2012), LWA performed superiorly to a simple nearest neighbor approach. In contrast, SR  
166 selects markers and predicts expression using regularized regression and the  $L_{0,\infty}$  objective.  
167 The appropriate level of regularization is again learned through cross-validation. Given these  
168 methods were built for use on microarray data and hence their dependence on normality, we  
169 applied them to a log-transformed version of our training collection ( $\log[\text{TPM} + 0.1]$ ).

170 In the third baseline (Tradict Shallow-Seq), we employ Tradict as usual; however, we  
171 restrict Tradict's selected markers to be the 100 most abundant genes in the transcriptome. This  
172 provides a control for Tradict's marker selection algorithm, and simulates a situation that would  
173 be typical of shallow sequencing, where only the most abundant genes are used to make  
174 conclusions about the rest of the transcriptome.

175 Figure 3e in the main text illustrates a performance comparison between Tradict and  
176 these three methods.

177  
178 **Robustness to noise:** We noticed that though Tradict iteratively selects markers to  
179 maximize explanatory power, these markers are not orthogonal. Consequently, during inference  
180 of the marker latent abundances, on which all expression predictions are based, the internal  
181 covariance among the markers will be used during estimation. In increasing data (larger  
182 sequencing depth, higher *a priori* abundance) the latent abundance inference will place less  
183 emphasis on this internal covariance; however, in situations of measurement inadequacy or error,  
184 the internal covariance will help to learn the correct latent abundances, which in turn, should  
185 stabilize predictions in noisy situations. To test this hypothesis, we considered a version of  
186 Tradict, 'Tradict no nc' (noise correction), in which only the diagonal of the internal marker  
187 covariance was used, effectively decoupling marker abundances in Tradict's underlying model.  
188 We re-evaluated intra-submission prediction accuracy for all of the methods, excluding Tradict  
189 Shallow-Seq, on the same training and test set above using 100 markers. However this time, in  
190 order to simulate situations of high measurement error, we rarefied samples in the test set to  
191 0.1x depth and evaluated each method's predicted (depth-normalized) expression accuracy; the  
192 original 1x depth values formed the basis of comparison. The 10<sup>th</sup>, 25<sup>th</sup>, 50<sup>th</sup>, 75<sup>th</sup>, and 90<sup>th</sup>  
193 percentiles of read depths in the 0.1x scenario were 0.65, 1.1, 2.1, 3.1, and 4.4 million reads,  
194 respectively -- all below the recommended depths for *A. thaliana*. 30-40% of the markers had  
195 zero abundance in nearly half of the samples. Supplementary Fig. 5 illustrates that though all  
196 methods perform worse at 0.1x depth, Tradict is least affected. Importantly, we notice that

197 Tradict no nc's performance is substantially reduced at lower depth, confirming our hypothesis  
198 that the internal marker covariance provides a valuable source of noise correction.

199  
200 **Supplementary Note 3 - Tradict's limitations as revealed by error, power, and program**  
201 **annotation robustness analyses**

202  
203 **I. Error analysis** - We first performed an error analysis in order to better understand the factors  
204 that contribute toward incorrect predictions. As done previously in Supplementary Note 2, we  
205 partitioned our transcriptome collection for *A. thaliana* into a training set and test set by  
206 submission and historical date. Like before, in order to mimic Tradict's use in practice as closely  
207 as possible, the training set contained the first 90% of submissions (208 submissions comprised  
208 of 2,389 samples) deposited on the SRA, and the test set contained the remaining 10% (17  
209 submissions comprised of 208 samples). We trained Tradict on the training set, and  
210 subsequently predicted program and gene expression in the test set using only the expression  
211 values of the selected markers as input. We evaluated test-set intra-submission performance  
212 using PCC and the normalized unexplained variance that Tradict's prediction could not account  
213 for. Mathematically, the normalized unexplained variance metric is the ratio of the residual  
214 variance divided by the total variance of the target:

$$\frac{\text{Var}(\text{true\_expression} - \text{predicted\_expression})}{\text{Var}(\text{true\_expression})}$$

216  
217  
218 The above expression is equivalent to one minus the coefficient of determination between the  
219 prediction and the target. For each program, we then correlated these measures of performance  
220 to the magnitude of training-set expression variation, average training-set abundance of  
221 constituent genes, and the number of genes contained within the program. Similarly, for each  
222 gene, we correlated the above measures of performance to the magnitude of training-set  
223 expression variation, average training-set abundance, and the number of programs in which the  
224 gene participates.

225 Supplementary Fig. 6a-b illustrate that the expression variance of the program correlates  
226 positively with better prediction performance. This makes intuitive sense, as it should be easier  
227 to understand marker-program covariance relationships and predict expression for those  
228 programs that vary more. We note, however, two outlier programs that have reasonably high  
229 expression variance, but low prediction accuracy (blue arrows, Supplementary Fig. 6a-b). These  
230 programs are composed of lowly expressed genes (Supplementary Fig. 6a-b, middle),  
231 suggesting that the mean expression level of genes contained within a program also positively  
232 correlate with Tradict's ability to predict that program's expression. Finally, we note that the  
233 more genes contained within the program, the easier it is to accurately predict (Supplementary  
234 Fig. 6a-b, right).

235 We built a linear model to model prediction accuracy -- as measured by log(unexplained  
236 variance) -- of a program as a function of its log(expression variance), average member  
237 abundance (as log-latent abundances), and log(program size). This model could predict  
238 log(unexplained variance) with a Spearman correlation coefficient of 0.75, suggesting that the  
239 three studied variables account for most of Tradict's errors (Supplementary Fig. 6d). We note  
240 that our performance measures -- unexplained variance and PCC -- are nearly perfectly  
241 correlated in rank (Supplementary Fig. 6c), and thus the above results also apply for the PCC  
242 performance criterion.

243 We performed a similar characterization for gene expression prediction. Unexpectedly,  
244 we found that better performance negatively correlated with increasing training-set expression

245 variance, but only weakly so (Supplementary Fig. 6e-f, left,  $\rho \sim 0.25$ ). Further examination of  
246 poorly predicted, high variance genes revealed that these genes were largely lowly expressed  
247 (Supplementary Fig. 6e-f, middle, blue brackets). Generally, measurements of lowly expressed  
248 genes tend to be contaminated with technical noise, making marker-gene covariance  
249 relationships difficult to estimate. Additionally, many of these genes generally have zero  
250 expression except for in a small subset of rarely sampled tissues (e.g. flower and bud, as  
251 opposed to leaf). This logistic-like distribution contributes strongly to training-set variance, but  
252 may make it difficult for Tradict, a linear method in the log-latent space, to train and predict  
253 accurately. We did not notice a strong correlation between prediction performance and the  
254 number of programs the gene participates in (Supplementary Fig. 6e-f, right).

255 This latter result is not unexpected. Though it is conceptually nice to think of Tradict  
256 making gene expression predictions by conditioning on program expression predictions,  
257 statistically these predictions are decoupled (see “Tradict - mathematical details” at the end of  
258 this document). Thus, there is no direct, statistical reason or methodological artifact as to why  
259 gene expression prediction accuracy should co-vary with the number of programs the gene is  
260 contained within. This result is important as it suggests that Tradict’s gene expression  
261 predictions are robust to the choice of transcriptional program annotation used.

262 As was done for programs, we attempted to account for the log(unexplained variance) of  
263 Tradict’s gene expression predictions using a linear model with the following predictors:  
264 log(expression variance), mean (log-latent) abundance, and the number of programs the gene  
265 participates in. We could not achieve the same explanatory power for genes as we did for  
266 programs, but we could still predict prediction error with a Spearman correlation of 0.48. Like  
267 before, we note a near perfect (up to 2-decimal precision) rank-correlation between our  
268 performance criterion, PCC and unexplained variance (Supplementary Fig. 6g).

269  
270  
271 **II. Power Analysis** - We next performed a power analysis in which we examined the number of  
272 samples required for Tradict to achieve its best prediction accuracy. As done previously, we  
273 partitioned our transcriptome collection for both *A. thaliana* and *M. musculus* into a training set  
274 and test set by submission and historical date. The training set contained the first 90% of  
275 submissions (208 submissions comprised of 2,389 samples for *A. thaliana*, and 1,443  
276 submissions comprised of 19,703 samples for *M. musculus*) deposited on the SRA, and the test  
277 set contained the remaining 10% (17 submissions comprised of 208 samples for *A. thaliana*,  
278 and 159 submissions comprised of 1,774 samples for *M. musculus*).

279 We then trained Tradict using different sized subsets of the training set and evaluated its  
280 predictive performance on the test set using the PCC and normalized unexplained variance  
281 criteria. The different sized subsets were chosen sequentially such that each subsequent subset  
282 included the submissions in the previous subset as well as more recent submissions (by date)  
283 to the SRA. Consequently, this analysis aims to mimic reality in that it shows how Tradict’s  
284 prospective test-set performance increases as more samples are submitted to the SRA.

285 Supplementary Fig. 7 shows that for both performance criterion and for both organisms,  
286 predictive performance begins to saturate for nearly all programs and genes after 750-1,000  
287 samples are included in the training set. We note that not just any collection of 1,000 samples  
288 will do. These samples must be sufficiently varied in context in order for Tradict to perform  
289 adequate training over the variety possible transcriptomic states. By the same token, the first  
290 1,000 samples to the SRA were likely not chosen to maximize exploration of the transcriptome.  
291 Thus, it may be possible to generate training sets that maximize Tradict’s performance with  
292 much fewer than 1,000 samples. However, this hypothesis requires further investigation.

293 The requirement for 1,000 samples is already met for many commonly studied  
294 organisms including *A. thaliana*, *M. musculus*, *D. melanogaster*, *S. cerevisiae*, *H. sapiens*, *C.*  
295 *elegans*, and *D. Rerio* (Supplementary Data Table 5). Below are listed several eukaryotic

296 organisms and the number of publicly available samples that are available for them on the SRA  
297 (current as of September 23, 2016).

|     |        |                            |
|-----|--------|----------------------------|
| 298 |        |                            |
| 299 | 6.9K   | <i>A. thaliana</i>         |
| 300 | 110.6K | <i>M. musculus</i>         |
| 301 | 8.6K   | <i>D. melanogaster</i>     |
| 302 | 5.7K   | <i>S. cerevisiae</i>       |
| 303 | 72.1K  | <i>H. sapiens</i> (public) |
| 304 | 2.7K   | <i>C. elegans</i>          |
| 305 | 18.1K  | <i>D. Rerio</i>            |

306 Reproduced from Supplementary Data Table 5.

307  
308 Investigators working with any of these model organisms should have enough samples (even  
309 after quality filtering) to reliably use Tradict. Importantly, they may add their own samples to the  
310 publicly available collection to make Tradict's predictions more accurate for their contexts of  
311 interest.

312  
313 **III. Program annotation robustness analysis** - In order to examine the impact of how the  
314 gene assignments used to define transcriptional programs affect Tradict's performance we  
315 performed a program annotation robustness analysis. We first partitioned our transcriptome  
316 collection for both *A. thaliana* and *M. musculus* into a training set and test set by submission  
317 and historical date as done in the previous section. For each transcriptional program we then  
318 exchanged 0%, 1%, 2%, 5%, 10% 20%, 50%, 80%, or 100% of the genes annotated to be in  
319 the program for another equivalent number of genes from the transcriptome that were not in the  
320 program. This gene exchange mimics corruption in the annotation. For each of these adjusted  
321 annotations, we examined Tradict's test-set prediction performance in the form of PCC and  
322 normalized unexplained variance.

323 Supplementary Fig. 8a-b illustrates how the PCC and normalized unexplained variance  
324 performance metrics behave as a function of the percentage of genes exchanged from each  
325 program in the *A. thaliana* test-set. Both performance criteria for program expression prediction  
326 show near equivalent performance for up to a 20% mis-annotation rate, which in practice is a  
327 comfortable cushion, especially for well controlled annotations, such as GO and KEGG. After a  
328 20% mis-annotation rate, the prediction accuracy for many (20-50%) programs begins to  
329 sharply deteriorate.

330 Interestingly, we note that even when 100% of genes in each program are exchanged  
331 for random ones during training, prediction PCC is high for many (>50%) of programs. To  
332 investigate this further, we examined the types of programs that maintain predictability versus  
333 those that lose it. Supplemental Table 6 shows that the programs that maintain high prediction  
334 accuracy are heavily enriched for global, transcriptionally far-reaching, "housekeeping"  
335 processes, and include processes related to growth, development, and metabolism. By contrast,  
336 the programs that are most sensitive to mis-annotation are those generally related to biotic and  
337 abiotic stress response regulons (e.g. response to light, and immune response).

338 We note that test-set gene expression prediction performance is invariant with respect to  
339 the level of program mis-annotation. This is expected because, as described in the "Error  
340 Analysis" section above, Tradict's gene expression predictions are statistically decoupled from  
341 program expression prediction.

#### 342 343 **Supplementary Note 4 - Timing and memory requirements**

344 We performed a training time analysis on the *M. musculus* transcriptome collection.  
345 Specifically, we recorded the time required to train Tradict as a function of the size of the



346 training set in terms of the number of samples. Supplementary Fig. 9 illustrates these results,  
347 and shows that training time was approximately linear in the size of the input (0.25  
348 seconds/sample). The largest bottlenecks during training come from lag-transforming the  
349 training-set and defining (computing the first principal component) and clustering the  
350 transcriptional programs for subsequent decomposition with Simultaneous Orthogonal Matching  
351 Pursuit. The range of training sample sizes explored here should be applicable for most  
352 contexts as the number publicly available samples for other model organisms (Supplementary  
353 Note 3.II) tend to be less than the number available for *M. musculus*. Additionally, the linear  
354 increase in time requirements suggests the method will scale well to larger datasets, with timing  
355 requirements in the hours range.

356 We also timed Tradict's prediction times. We found that prediction times were linear in  
357 the number of samples and that generating a prediction for each sample required 3.1 seconds.  
358 The limiting factor was MCMC sampling of the conditional posterior distributions of each gene  
359 and program. We have also developed a subroutine that allows users to just obtain maximum a  
360 *posteriori* estimates of gene and program expression. This prediction task is considerably faster,  
361 only requiring 0.02 seconds per sample.

362 Tradict's peak memory usage during training scaled linearly with training input size. At  
363 the largest training set size examined (19,703 samples), peak memory consumption was 25.3  
364 GB. Loading the training set expression matrix alone (values stored as double precision floats)  
365 consumed 5.2 GB of memory. Regressing peak memory consumption onto training-set size we  
366 found the equation MEMORY (GB) = 0.0011\*NUM\_SAMPLES + 5.2 described memory usage  
367 well.

368 All computations were performed using one core of a Lenovo P700 ThinkStation with  
369 two Intel Xeon E5-2620 v3 processors and 32 GB of DDR4 ECC RDIMM RAM.

### 370 371 **Supplementary Note 5 - Tradict accurately predicts temporal dynamics of innate immune** 372 **signaling in CRISPRed in primary immune cells**

373 To further dissect Tradict's capabilities, we examined a *M. musculus* dataset from  
374 Parnas *et al.* (2015) in which one of the first CRISPR screens was performed on primary  
375 immune cells to look for regulators of tumor necrosis factor (Tnf) expression<sup>5</sup>. They found many  
376 positive regulators of Tnf expression and created clonal bone-marrow derived dendritic cell  
377 (BDMC) lines where each positive regulator was disrupted using CRISPR. They used shallow  
378 RNA-sequencing (2.75 +/- 1.2 million reads) to profile the transcriptomes of these lines for 6  
379 hours after lipopolysaccharide (LPS) treatment.

380 We asked whether Tradict's predictions could quantitatively recapitulate actuality,  
381 despite the challengingly noisy marker measurements due to the low sequencing depth. To be  
382 specific, approximately 30% of the markers had zero measured expression in greater than 40%  
383 of samples. After performing the batch correction described in Parnas *et al.* (2015), we  
384 examined the expression of the "response to lipopolysaccharide" transcriptional program.  
385 Supplementary Fig. 10a illustrates that despite the limitation on marker measurement accuracy,  
386 Tradict predicts response to LPS with a PCC accuracy of 0.905. Differential transcriptional  
387 program expression analysis revealed that DE programs based on Tradict's predictions were  
388 highly concordant with those based on actual measurements (Supplementary Fig. 10b).  
389 Strikingly, programs found DE based on Tradict predictions included 92% of those directly  
390 related to innate immune signaling in mice.

391 We next examined the quantitative quality of Tradict predictions by observing how the  
392 DE programs found by either analysis of actual measurements or predictions behave across  
393 time. Supplementary Fig. 10c illustrates that despite the high marker measurement error,  
394 Tradict's predictions are quantitatively concordant with actuality. As expected most cell lines  
395 with CRISPRed positive regulators demonstrate loss of innate immune signaling.

396

397  
398  
399  
400  
401  
402  
403  
404  
405  
406  
407  
408  
409  
410  
411  
412  
413  
414  
415  
416  
417  
418  
419  
420  
421  
422  
423  
424  
425  
426  
427  
428  
429  
430  
431  
432  
433  
434  
435  
436  
437  
438  
439  
440  
441

## References

1. Crowley, J. J. *et al.* Analyses of allele-specific gene expression in highly divergent mouse crosses identifies pervasive allelic imbalance. *Nat. Genet.* **47**, (2015).
2. Greenham, K. & McClung, C. R. Integrating circadian dynamics with physiological processes in plants. *Nat Rev Genet* **16**, 598–610 (2015).
3. Donner, Y., Feng, T., Benoist, C. & Koller, D. Imputing gene expression from selectively reduced probe sets. *Nat. Methods* **9**, (2012).
4. Leinonen, R., Sugawara, H. & Shumway, M. The Sequence Read Archive. **39**, 2010–2012 (2011).
5. Parnas, O., Jovanovic, M., Eisenhaure, M. & Zhang, F. A Genome-wide CRISPR Screen in Primary Immune Cells to Dissect Regulatory Networks. *Cell* **162**, 1–12 (2015).
6. Patro, R., Mount, S. M. & Kingsford, C. Sailfish enables alignment-free isoform quantification from RNA-seq reads using lightweight algorithms. *Nat. Biotechnol.* **32**, 462–4 (2014).
7. Biswas, S. The latent logarithm. *arXiv* 1–11 (2016).
8. Ma, S. & Kosorok, M. R. Identification of differential gene pathways with principal component analysis. *Bioinformatics* **25**, 882–889 (2009).
9. Fan, J. *et al.* Characterizing transcriptional heterogeneity through pathway and gene set overdispersion analysis. *Nat. Methods* **13**, 241–244 (2016).
10. Ashburner, M. *et al.* Gene Ontology: tool for the unification of biology. *Nat Genet* **25**, 25–29 (2000).
11. The Gene Ontology Consortium. Gene Ontology Consortium: going forward. *Nucleic Acids Res.* **43**, D1049–D1056 (2015).
12. Tropp, J. a & Gilbert, A. C. Signal Recovery From Random Measurements Via Orthogonal Matching Pursuit. *IEEE Trans. Inf. Theory* **53**, 4655–4666 (2007).
13. Tropp, J. a., Gilbert, A. C. & Strauss, M. J. Algorithms for simultaneous sparse approximation. Part I: Greedy pursuit. *Signal Processing* **86**, 572–588 (2006).
14. Monti, S., Tamayo, P., Mesirov, J. & Golub, T. Consensus Clustering : A Resampling-Based Method for Class Discovery and Visualization of Gene Expression Microarray Data. *Mach. Learn.* **52**, 91–118 (2003).
15. Yu, Z., Wong, H.-S. & Wang, H. Graph-based consensus clustering for class discovery from gene expression data. *Bioinforma.* **23** , 2888–2896 (2007).
16. Davies, D. L. & Bouldin, D. W. A Cluster Separation Measure. *IEEE Trans. Pattern Anal. Mach. Intell.* **2**, 224–227 (1979).
17. Aitchison, J. & Shen, S. M. Logistic-Normal Distributions: Some Properties and Uses. *Biometrika* **67**, 261 (1980).
18. Aitchison, J. & Ho, C. H. The multivariate Poisson-log normal distribution. *Biometrika* **76**, 643–653 (1989).
19. Biswas, S., Mcdonald, M., Lundberg, D. S., Dangl, J. L. & Jojic, V. Learning Microbial Interaction Networks from Metagenomic Count Data. in *Res. Comput. Mol. Biol.* **1**, 32–43 (2015).
20. Ho, C. H. & Kong, H. The multivariate Poisson-log normal distribution. **2**, (1989).
21. Madsen, L. & Dalthorp, D. Simulating correlated count data. *Environ. Ecol. Stat.* **14**, 129–148 (2007).
