# Supplementary material for: Tradict enables accurate prediction of eukaryotic transcriptional states from 100 marker genes
Source: PubMed Central journal article supplement (PMC5424156; doi:10.1038/ncomms15309), 2017-05-05
Supplement: ncomms15309-s10.pdf [file ncomms15309-s10.pdf]

**Editorial Note:** this manuscript has been previously reviewed at another journal that is not operating a transparent peer review scheme. This document only contains reviewer comments and rebuttal letters for versions considered at Nature Communications.
